# Supplementary material
Source: PubMed Central journal article supplement (PMC7965151)
Supplement: 3718_materials.pdf [file 3718_materials.pdf]

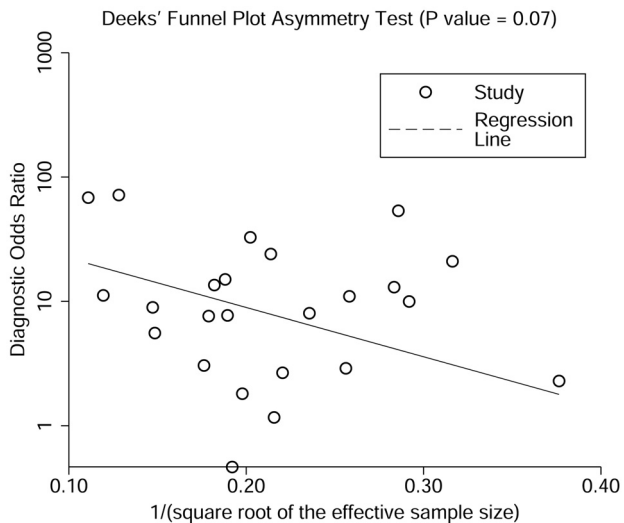

**ON-LINE FIG 1.** Funnel plot of Deeks et al <sup>40</sup> based on the data of <sup>18</sup>F-FDG-PET for differentiating brain tumors.

### ON-LINE APPENDIX

#### Search Strategies

The search strategy was based on the combination of the key words: brain neoplasms; <sup>18</sup>F-FDG or fluorodeoxyglucose; <sup>11</sup>C-MET or methionine; and PET, or positron emission tomography.

#### PubMed

((“Brain Neoplasms”[MeSH Terms] OR “Glioma”[MeSH Terms] OR glioma\* OR (glioblastoma\* OR “glioblastoma multiforme”) OR (astrocytoma\* OR “anaplastic astrocytoma”) OR (oligodendrocytoma\* OR “anaplastic oligodendrocytoma”) OR (brain AND (tumor\* OR tumour\*)) OR (neuroectodermal AND (tumor\* OR tumour\*)) OR ependymoma\* OR oligodendroglioma\*) AND (“fdg”[All Fields] OR “fluorodeoxyglucose”[All Fields] OR “MET”[All Fields] OR “methionine”[All Fields]) AND (“Tomography, Emission-Computed”[MeSH Terms] OR (positron AND emission AND tomograph\*) OR pet) AND “humans”[MeSH Terms].

#### Scopus

(TITLE-ABS-KEY(glioma) OR TITLE-ABS-KEY(astrocytoma) OR TITLE-ABS-KEY(oligodendrocytoma) OR TITLE-ABS-

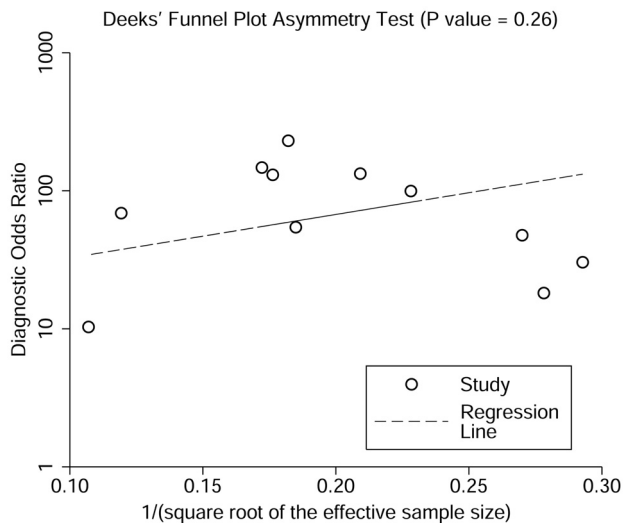

**ON-LINE FIG 2.** Funnel plot of Deeks et al <sup>40</sup> based on the data of <sup>11</sup>C-MET PET for differentiating brain tumors.

KEY(neuroectodermal) OR TITLE-ABS-KEY(ependymoma) OR TITLE-ABS-KEY(glioblastoma) OR TITLE-ABS-KEY(oligodendroglioma) OR TITLE-ABS-KEY(brain tumor) AND TITLE-ABS-KEY(pet) OR TITLE-ABS-KEY(positron emission tomography) AND TITLE-ABS-KEY(fluorodeoxyglucose) OR TITLE-ABS-KEY(fdg) AND TITLE-ABS-KEY(methionine) OR TITLE-ABS-KEY(met)).

#### China National Knowledge Infrastructure

(PET or positron emission tomography) AND (brain tumor) AND ((<sup>18</sup>F-FDG OR fluorodeoxyglucose) OR (<sup>11</sup>C-MET or methionine)) AND (diagnosis) (keywords were translated into Chinese).

#### Meta-Analysis Commands in STATA 12.0

- 1) For testing pooled diagnostic performance and heterogeneity: midas tp fp fn tn, es(x) res(all).
- 2) For plotting HSROC curves: metandi tp fp fn tn, plot.
- 3) For testing publication bias: midas tp fp fn tn, pubbias.
- 4) For estimating covariate effect (meta-regression): midas tp fp fn tn type, es(x) covars.

**On-line Table 1: Study and patient characteristics of eligible studies**

| Study                               | Country       | Design        | Patient No. | M/F   | Mean/Median Age (yr) | Type of Brain Tumors                                            | Disease Status | PET Tracer             | Prior Imaging Tests | Reference Standard                                                | Clinical/Radiologic Follow-Up after PET (Mean/Median, mo) |
|-------------------------------------|---------------|---------------|-------------|-------|----------------------|-----------------------------------------------------------------|----------------|------------------------|---------------------|-------------------------------------------------------------------|-----------------------------------------------------------|
| Chen et al 2006 <sup>1</sup>        | United States | Prospective   | 30          | 18:12 | 45.2                 | Glioma, brain metastasis                                        | SPBT and SRBT  | FDG                    | MRI                 | Histology or clinical follow-up                                   | 20                                                        |
| Ricci et al 1998 <sup>2</sup>       | United States | Retrospective | 31          | 17:14 | 46                   | Glioma, unknown (2 pts)                                         | SRBT           | FDG                    | MRI                 | Histology only                                                    | ND                                                        |
| Zuo et al 2001 <sup>3</sup>         | China         | Retrospective | 15          | 10:5  | 36                   | Glioma                                                          | SRBT           | FDG                    | MRI                 | Histology or clinical follow-up                                   | ND                                                        |
| Gómez-Río et al 2008 <sup>6</sup>   | Spain         | Prospective   | 76          | 43:33 | 47.7                 | Glioma                                                          | SRBT           | FDG                    | MRI                 | Histology or clinical follow-up                                   | 31                                                        |
| Choi et al 2005 <sup>7</sup>        | Korea         | Prospective   | 26          | 15:11 | 34                   | Glioma, lymphoma, brain metastasis                              | SPBT and SRBT  | FDG                    | MRI                 | Histology, clinical and radiologic follow-up                      | >6                                                        |
| Pauleit et al 2009 <sup>8</sup>     | Germany       | Prospective   | 52          | 36:16 | 46                   | Glioma, lymphoma                                                | SPBT           | FDG                    | MRI                 | Histology only                                                    | ND                                                        |
| Lau et al 2010 <sup>9</sup>         | Australia     | Prospective   | 21          | 14:7  | 37                   | Gliomas, meningioma, lymphoma                                   | SPBT and SRBT  | FDG                    | MRI                 | Histology, MRI, and clinical follow-up                            | 20                                                        |
| Estroza et al 2008 <sup>10</sup>    | Mexico        | Prospective   | 30          | 20:10 | 43                   | Glioma                                                          | SRBT           | FDG                    | MRI                 | Histology, imaging, and clinical follow-up                        | >6                                                        |
| McCarthy et al 2008 <sup>11</sup>   | Australia     | Retrospective | 38          | 15:23 | 45                   | Glioma, lymphoma                                                | SPBT and SRBT  | FDG                    | MRI                 | Histology or clinical follow-up                                   | 9.1                                                       |
| Kahn et al 1994 <sup>2</sup>        | United States | Prospective   | 19          | 10:9  | 40                   | Glioma, esthesioblastoma, brain metastasis                      | SRBT           | FDG                    | MRI or CT           | Histology or clinical follow-up                                   | 12                                                        |
| Thompson et al 1999 <sup>3</sup>    | United States | Retrospective | 15          | ND    | 52                   | Glioma                                                          | SRBT           | FDG                    | MRI                 | Histology only                                                    | ND                                                        |
| Sun et al 2004 <sup>14</sup>        | China         | Prospective   | 32          | 21:11 | 34                   | Glioma, brain metastasis                                        | SRBT           | FDG                    | ND                  | Histology, clinical and radiologic follow-up                      | ND                                                        |
| Santra et al 2012 <sup>15</sup>     | India         | Prospective   | 90          | ND    | 36.8                 | Glioma                                                          | SRBT           | FDG                    | ND                  | Histology, imaging, and clinical follow-up                        | ND                                                        |
| Hong et al 2011 <sup>16</sup>       | Korea         | Prospective   | 20          | 10:10 | 32                   | Glioma, choroid plexus carcinoma, PNET, DNET                    | SRBT           | FDG                    | MRI                 | Histology, clinical and radiologic follow-up                      | 10                                                        |
| Tan et al 2011 <sup>17</sup>        | China         | Retrospective | 55          | 45:10 | 56.6                 | Glioma, lymphoma, neuroblastoma, germinoma, brain metastasis    | SRBT           | FDG                    | MRI                 | Histology, clinical and radiologic follow-up                      | >11                                                       |
| Enslow et al 2012 <sup>18</sup>     | United States | Prospective   | 15          | 9:6   | 22-75 <sup>a</sup>   | Glioma                                                          | SRBT           | FDG                    | Gd-MRI              | Longitudinal observation by Gd-MRI                                | 2-23                                                      |
| Belohlávek et al 2002 <sup>19</sup> | Czech         | Prospective   | 29          | 21:8  | 17-65 <sup>a</sup>   | Glioma                                                          | SRBT           | FDG                    | MRI                 | Histology, radiologic and clinical follow-up                      | >12                                                       |
| Spence et al 2009 <sup>20</sup>     | United States | Prospective   | 19          | 13:6  | 45.2                 | Glioma                                                          | SRBT           | FDG                    | MRI                 | Histology, clinical and radiologic follow-up                      | 3-31                                                      |
| Janus et al 1993 <sup>21</sup>      | United States | Retrospective | 50          | 32:18 | 38.3                 | Glioma, ependymoma                                              | SRBT           | FDG                    | MRI                 | Histology, clinical follow-up                                     | 12                                                        |
| Kim et al 2010 <sup>22</sup>        | Korea         | Retrospective | 10          | 8:2   | 46.1                 | Glioma                                                          | SRBT           | FDG, MET               | MRI                 | Histology and clinical follow-up                                  | 6.5 (recurrence), 28 (recrosis)                           |
| Cai et al 2009 <sup>23</sup>        | China         | Retrospective | 41          | 23:18 | 49.2                 | Glioma, neuroblastoma, craniopharyngioma, brain metastasis      | SPBT           | FDG, MET               | MRI                 | Histology, clinical and radiologic follow-up                      | >6                                                        |
| Tripathi et al 2012 <sup>24</sup>   | India         | Prospective   | 35          | 23:12 | 33.7                 | Glioma                                                          | SRBT           | FDG, MET               | MRI                 | Histology, clinical and radiologic follow-up                      | >18                                                       |
| Li et al 2012 <sup>25</sup>         | China         | Retrospective | 44          | 26:18 | 38.6                 | Glioma                                                          | SPBT and SRBT  | FDG, MET               | ND                  | Histology and clinical follow-up                                  | >6                                                        |
| Ye et al 2009 <sup>26</sup>         | China         | Prospective   | 28          | 21:7  | 47.3                 | Glioma                                                          | SRBT           | FDG, MET               | MRI (not all pts)   | Histology and clinical follow-up                                  | 10-18                                                     |
| Chung et al 2002 <sup>29</sup>      | Korea         | Prospective   | 45          | ND    | ND                   | Glioma, meningioma, germ cell tumor, chordoma, brain metastasis | SPBT and SRBT  | FDG <sup>b</sup> , MET | ND                  | Histology, radiologic and laboratory investigations and follow-up | ND                                                        |
| Nakajima et al 2009 <sup>30</sup>   | Japan         | Retrospective | 18          | 12:6  | 45                   | Glioma                                                          | SRBT           | MET                    | MRI                 | Histology, imaging, and clinical follow-up                        | 66.8                                                      |
| Terakawa et al 2008 <sup>41</sup>   | Japan         | Retrospective | 77          | 46:31 | 54.1                 | Glioma, brain metastasis                                        | SRBT           | MET                    | MRI                 | Histology, clinical and radiologic follow-up                      | ND                                                        |
| Gaidliks et al 2010 <sup>42</sup>   | Germany       | Prospective   | 39          | ND    | 15                   | Glioma, medulloblastoma, DNET, ATRT                             | SPBT and SRBT  | MET                    | MRI                 | Histology, clinical and radiologic follow-up                      | 25.5                                                      |
| Sonoda et al 1998 <sup>43</sup>     | Japan         | Retrospective | 10          | 6:4   | 36                   | Glioma                                                          | SRBT           | MET                    | MRI                 | Histology, clinical and radiologic follow-up                      | ND                                                        |
| Tsuyuguchi et al 2004 <sup>44</sup> | Japan         | Retrospective | 11          | 8:3   | 35.5                 | Glioma                                                          | SRBT           | MET                    | MRI                 | Histology, clinical and radiologic follow-up                      | >5                                                        |

**Note:**—ND indicates no data; PNET, primitive neuroectodermal tumors; DNET, dysembryoplastic neuroepithelial tumor; ATRT, atypical teratoid rhabdoid tumor; pts, patients; Gd, gadolinium.

<sup>a</sup> Age range.

<sup>b</sup> Data for <sup>18</sup>F-FDG-PET in this study were not extractable and were excluded for the analysis for <sup>18</sup>F-FDG-PET.

**On-line Table 2: PET characteristics and diagnostic criteria of eligible studies**

| Study                               | PET Tracer | Type of PET Scanner | Administered PET Tracer Activity (MBq) | Time of Scanning after Injection (min) | Scan Time (min) | Analysis Method for Diagnostic Performance | Positive Criteria of Visual Assessment                                                                                                                                 | Quantitative Parameters (Cutoff Value)         |
|-------------------------------------|------------|---------------------|----------------------------------------|----------------------------------------|-----------------|--------------------------------------------|------------------------------------------------------------------------------------------------------------------------------------------------------------------------|------------------------------------------------|
| Chen et al 2006 <sup>1</sup>        | FDG        | PET                 | 2.4/kg                                 | 60                                     | 30              | Qualitative                                | FDG activity above background level                                                                                                                                    | —                                              |
| Ricci et al 1998 <sup>2</sup>       | FDG        | PET                 | 370                                    | 30                                     | 25              | Qualitative                                | Hypermetabolic relative to normal contralateral white matter                                                                                                           | —                                              |
| Zuo et al 2001 <sup>5</sup>         | FDG        | PET                 | 185                                    | 30                                     | 10              | Qualitative                                | Increased metabolism above adjacent white matter                                                                                                                       | —                                              |
| Gómez-Río et al 2008 <sup>6</sup>   | FDG        | PET                 | 185                                    | 45                                     | ND              | Qualitative                                | Unexplainable metabolic activity, increased FDG uptake relative to immediately adjacent tissue or closest adjacent white matter                                        | —                                              |
| Choi et al 2005 <sup>7</sup>        | FDG        | PET                 | 370                                    | 60                                     | 20              | Qualitative                                | FDG uptake above normal white matter                                                                                                                                   | —                                              |
| Pauleit et al 2009 <sup>8</sup>     | FDG        | PET                 | 240                                    | 30–60                                  | ND              | Qualitative                                | FDG uptake above white matter                                                                                                                                          | —                                              |
| Lau et al 2010 <sup>9</sup>         | FDG        | PET/CT              | 400                                    | 60                                     | ND              | Qualitative                                | Not clearly mentioned                                                                                                                                                  | —                                              |
| Estrada et al 2008 <sup>10</sup>    | FDG        | PET                 | 185                                    | 30–40                                  | 30              | Qualitative                                | With uptake in a region showing enhancing areas on postcontrast T1-weighted MRI                                                                                        | —                                              |
| McCarthy et al 2008 <sup>11</sup>   | FDG        | PET                 | 370 × BSA/1.88                         | 30–40                                  | ND              | Qualitative                                | FDG uptake greater than background                                                                                                                                     | —                                              |
| Kahn et al 1994 <sup>12</sup>       | FDG        | PET                 | 370                                    | 0                                      | 45              | Qualitative                                | Increased FDG uptake relative to the immediately adjacent tissue                                                                                                       | —                                              |
| Thompson et al 1999 <sup>13</sup>   | FDG        | PET                 | ND                                     | 40                                     | 30              | ND                                         | ND                                                                                                                                                                     | —                                              |
| Sun et al 2004 <sup>14</sup>        | FDG        | PET                 | 185–370                                | 30–60                                  | 20              | Qualitative                                | FDG uptake greater than contralateral white matter                                                                                                                     | —                                              |
| Santra et al 2012 <sup>15</sup>     | FDG        | PET/CT              | 370                                    | 45–60                                  | 6–10            | Qualitative                                | A definite lesion on CT images (hypermetabolic/isometabolic/hypometabolic on PET images) or an increased focal FDG uptake without any clearly discernible lesion on CT | —                                              |
| Hong et al 2011 <sup>16</sup>       | FDG        | PET                 | 370                                    | 60                                     | 15              | Qualitative                                | FDG uptake greater than normal white matter                                                                                                                            | —                                              |
| Tan et al 2011 <sup>17</sup>        | FDG        | PET/CT              | 275–370                                | 60                                     | ND              | Qualitative                                | Increased FDG uptake relative to the surrounding background radioactivity                                                                                              | —                                              |
| Enslow et al 2012 <sup>18</sup>     | FDG        | PET                 | 370                                    | 45                                     | 30              | Both <sup>a</sup>                          | ND                                                                                                                                                                     | L/WM (1.83), SUVmax (6.2)                      |
| Belohlávek et al 2002 <sup>19</sup> | FDG        | PET                 | 3/kg                                   | 30                                     | 20–25           | Qualitative                                | Clearly apparent focal accumulation of FDG                                                                                                                             | —                                              |
| Spence et al 2009 <sup>20</sup>     | FDG        | PET                 | 3.7/kg                                 | 75                                     | 15              | Quantitative                               | ND                                                                                                                                                                     | T/C (0.4), T/WM (0.61) <sup>b</sup>            |
| Janus et al 1993 <sup>21</sup>      | FDG        | PET                 | 185–370                                | ND                                     | About 20        | Qualitative                                | Increased FDG uptake relative to the contralateral hemisphere or adjacent area                                                                                         | —                                              |
| Kim et al 2010 <sup>22</sup>        | FDG, MET   | PET                 | 370–555 (FDG) 550–740 (MET)            | 40 (FDG) 10 (MET)                      | 20 (both)       | Quantitative                               | ND                                                                                                                                                                     | Lmax/Rmax (145, FDG; 2.64, MET)                |
| Cai et al 2009 <sup>23</sup>        | FDG, MET   | PET/CT              | 222–370 (FDG) 555–740 (MET)            | 60 (FDG) 20 (MET)                      | ND              | Qualitative                                | Tracer uptake greater than white matter                                                                                                                                | —                                              |
| Tripathi et al 2012 <sup>24</sup>   | FDG, MET   | PET/CT              | 222–296 (FDG) 550–740 (MET)            | 60 (FDG) 20 (MET)                      | 20 (both)       | Quantitative                               | ND                                                                                                                                                                     | T/N (0.75, FDG; 1.9, MET)                      |
| Li et al 2012 <sup>25</sup>         | FDG, MET   | PET/CT              | 259–444 (FDG) 370–555 (MET)            | 50–60 (FDG) 10 (MET)                   | 10 (both)       | Qualitative                                | Not clearly mentioned                                                                                                                                                  | —                                              |
| Ye et al 2009 <sup>26</sup>         | FDG, MET   | PET/CT              | 4.4–7.4/kg (FDG) 5.5–7.4/kg (MET)      | 50–60 (FDG) 10 (MET)                   | 10 (both)       | Quantitative                               | ND                                                                                                                                                                     | SUV (2.5, FDG and MET)                         |
| Chung et al 2002 <sup>29,c</sup>    | MET        | PET                 | 555–740 (MET)                          | 10 (MET)                               | 20              | Qualitative                                | MET uptake greater than contralateral gray matter without any morphologic abnormalities                                                                                | —                                              |
| Nakajima et al 2009 <sup>30</sup>   | MET        | PET                 | 200–550                                | 20                                     | 10              | Quantitative                               | ND                                                                                                                                                                     | L/R (2.0)                                      |
| Terakawa et al 2008 <sup>41</sup>   | MET        | PET                 | 6/kg                                   | 20                                     | 10              | Quantitative                               | ND                                                                                                                                                                     | L/Nmean (1.41, brain metastasis; 1.58, glioma) |
| Gaidjiks et al 2010 <sup>42</sup>   | MET        | PET                 | 11/kg                                  | 0/20                                   | 60/40           | Quantitative                               | ND                                                                                                                                                                     | Relative MET uptake (1.48)                     |
| Sonoda et al 1998 <sup>43</sup>     | MET        | PET                 | 111–555                                | 30                                     | 10              | Qualitative                                | Increased uptake                                                                                                                                                       | —                                              |
| Tsuyugui et al 2004 <sup>44</sup>   | MET        | PET                 | 370                                    | 20                                     | 10              | Qualitative                                | MET accumulation in the lesion                                                                                                                                         | —                                              |

**Note:**—ND indicates no data; BSA, body surface area; L/WM, ratio of <sup>18</sup>F-FDG lesion to contralateral white matter; SUV, standard uptake value; SUVmax, maximum standard uptake value; T/C, ratio of SUV/SUVmax of tumor to that of cortex; T/WM, ratio of SUV/SUVmax of tumor to that of white matter; Lmax/Rmax, the uptake ratio of the maximum uptake of the lesion to the maximum uptake of the referential contralateral cerebral white matter; T/N, tumor-to-normal contralateral cortex ratio; L/R, the mean counts per pixel in the lesion ROI divided by the mean counts per pixel in the reference ROI; L/Nmean, the SUVmean of the lesion to the SUVmean of the contralateral normal frontal lobe gray matter; —, not available.

<sup>a</sup> Data from visual assessment was used for analysis.

<sup>b</sup> Used for diagnostic performance.

<sup>c</sup> Data for <sup>18</sup>F-FDG-PET in this study were not extractable and excluded for the analysis for <sup>18</sup>F-FDG-PET.

**On-line Table 3: Quality assessment of eligible studies<sup>a</sup>**

| Study                               | 1 | 2 | 3 | 4 | 5 | 6 | 7 | 8 | 9 | 10 | 11 | 12 | 13 | 14 | Total Score |
|-------------------------------------|---|---|---|---|---|---|---|---|---|----|----|----|----|----|-------------|
| Chen et al 2006 <sup>1</sup>        | Y | Y | Y | N | Y | N | Y | Y | Y | Y  | U  | Y  | Y  | Y  | 23          |
| Ricci et al 1998 <sup>2</sup>       | Y | U | Y | Y | Y | Y | Y | Y | Y | Y  | U  | Y  | Y  | N  | 24          |
| Zuo et al 2001 <sup>5</sup>         | N | U | U | U | Y | N | Y | Y | U | Y  | U  | Y  | U  | U  | 17          |
| Gómez-Río et al 2008 <sup>6</sup>   | N | Y | Y | N | Y | N | Y | N | Y | Y  | U  | Y  | U  | U  | 17          |
| Choi et al 2005 <sup>7</sup>        | Y | Y | Y | N | Y | N | Y | Y | Y | Y  | U  | Y  | Y  | Y  | 23          |
| Pauleit et al 2009 <sup>8</sup>     | Y | Y | Y | U | Y | Y | Y | N | Y | Y  | U  | U  | Y  | Y  | 23          |
| Lau et al 2010 <sup>9</sup>         | Y | Y | Y | N | Y | U | Y | N | Y | Y  | U  | Y  | Y  | U  | 21          |
| Estrada et al 2008 <sup>10</sup>    | N | Y | U | N | Y | N | N | Y | Y | U  | U  | U  | U  | Y  | 15          |
| McCarthy et al 2008 <sup>11</sup>   | Y | Y | Y | N | Y | N | Y | N | Y | Y  | U  | Y  | U  | Y  | 20          |
| Kahn et al 1994 <sup>12</sup>       | Y | Y | Y | N | Y | N | Y | Y | Y | Y  | U  | Y  | Y  | Y  | 23          |
| Thompson et al 1999 <sup>13</sup>   | N | U | Y | Y | Y | N | Y | N | Y | U  | U  | U  | U  | U  | 16          |
| Sun et al 2004 <sup>14</sup>        | Y | U | U | U | Y | N | Y | Y | U | Y  | U  | Y  | U  | U  | 19          |
| Santra et al 2012 <sup>15</sup>     | N | Y | Y | U | Y | N | U | Y | U | Y  | U  | Y  | U  | Y  | 19          |
| Hong et al 2011 <sup>16</sup>       | Y | Y | Y | N | Y | N | Y | Y | Y | Y  | U  | Y  | Y  | Y  | 23          |
| Tan et al 2011 <sup>17</sup>        | Y | Y | Y | N | Y | N | Y | N | Y | Y  | U  | Y  | U  | U  | 19          |
| Enslow et al 2012 <sup>18</sup>     | N | Y | U | N | Y | U | Y | Y | N | Y  | U  | Y  | Y  | U  | 17          |
| Belohlávek et al 2002 <sup>19</sup> | N | U | Y | N | Y | N | Y | Y | Y | Y  | U  | Y  | Y  | U  | 19          |
| Spence et al 2009 <sup>20</sup>     | N | Y | U | N | Y | N | N | Y | Y | N  | N  | Y  | N  | Y  | 13          |
| Janus et al 1993 <sup>21</sup>      | Y | Y | U | N | Y | N | Y | N | Y | Y  | U  | Y  | U  | U  | 18          |
| Kim et al 2010 <sup>22</sup>        | N | Y | Y | N | Y | N | Y | Y | Y | Y  | U  | Y  | Y  | Y  | 21          |
| Cai et al 2009 <sup>23</sup>        | Y | Y | Y | N | Y | N | Y | N | Y | Y  | U  | Y  | Y  | U  | 20          |
| Tripathi et al 2012 <sup>24</sup>   | N | Y | Y | N | Y | N | Y | Y | Y | Y  | U  | Y  | Y  | Y  | 21          |
| Li et al 2012 <sup>25</sup>         | N | Y | Y | U | Y | N | Y | Y | Y | Y  | U  | U  | U  | Y  | 19          |
| Ye et al 2009 <sup>26</sup>         | N | U | Y | N | Y | N | Y | Y | Y | Y  | U  | Y  | U  | U  | 18          |
| Chung et al 2002 <sup>29</sup>      | Y | Y | Y | U | Y | N | Y | Y | U | Y  | U  | Y  | U  | U  | 21          |
| Nakajima et al 2009 <sup>30</sup>   | N | Y | Y | N | Y | N | Y | Y | Y | Y  | U  | Y  | Y  | Y  | 21          |
| Terakawa et al 2008 <sup>41</sup>   | Y | Y | Y | U | Y | N | Y | Y | U | Y  | U  | Y  | U  | Y  | 22          |
| Galldiks et al 2010 <sup>42</sup>   | Y | Y | Y | N | Y | N | Y | Y | Y | Y  | U  | Y  | U  | Y  | 22          |
| Sonoda et al 1998 <sup>43</sup>     | N | Y | U | U | Y | N | Y | Y | U | Y  | U  | Y  | Y  | Y  | 20          |
| Tsuyuguchi et al 2004 <sup>44</sup> | N | Y | Y | N | Y | N | Y | Y | Y | Y  | U  | Y  | Y  | Y  | 21          |

**Note:**—Y indicates yes or bias avoided; N, no or bias not avoided; U, unclear.

<sup>a</sup>1, Spectrum bias: was the spectrum of patients representative of the patients who will receive the test in practice? 2, Selection criteria: were selection criteria clearly described? 3, Reference standard: is the reference standard likely to correctly classify the target condition? 4, Disease progression bias: is the time between the reference standard and index test short enough to be reasonably sure that the target condition did not change between the 2 tests? 5, Partial verification: did the whole sample or a random selection of the sample receive verification using a reference standard of diagnosis? 6, Differential verification bias: did patients receive the same reference standard regardless of the index test result? 7, Incorporation bias: was the reference standard independent of the index test (ie, the index test did not form part of the reference standard)? 8, Index test execution: was the execution of the index test described in sufficient detail to permit replication of the test? 9, Reference standard execution: was the execution of the reference standard described in sufficient detail to permit its replication? 10, Test/diagnosis review bias: were the index test results interpreted without knowledge of the results of the reference standard? 11, Reference standard review bias: were the reference standard results interpreted without knowledge of the results of the index test? 12, Clinical review bias: were the same clinical data available when test results were interpreted as would be available when the test was used in practice? 13, Uninterpretable test results: were uninterpretable/intermediate test results reported? 14, Withdrawal: were withdrawals from the study explained?

**On-line Table 4: Influence of individual studies for diagnostic performance of <sup>18</sup>F-FDG-PET in brain tumors**

| Excluding Study One<br>by One       | Pooled Sensitivity (95% CI) | Pooled Specificity (95% CI) | Comparison with Overall<br>(P Value) <sup>a</sup> |
|-------------------------------------|-----------------------------|-----------------------------|---------------------------------------------------|
| Overall                             | 0.71 (0.63–0.78)            | 0.77 (0.67–0.85)            |                                                   |
| Chen et al 2006 <sup>1</sup>        | 0.72 (0.63–0.79)            | 0.78 (0.68–0.86)            | >.05                                              |
| Ricci et al 1998 <sup>2</sup>       | 0.70 (0.62–0.77)            | 0.79 (0.70–0.86)            | >.05                                              |
| Zuo et al 2001 <sup>5</sup>         | 0.70 (0.62–0.77)            | 0.77 (0.66–0.85)            | >.05                                              |
| Gómez-Río et al 2008 <sup>6</sup>   | 0.71 (0.62–0.78)            | 0.75 (0.65–0.84)            | >.05                                              |
| Choi et al 2005 <sup>7</sup>        | 0.72 (0.63–0.79)            | 0.76 (0.65–0.84)            | >.05                                              |
| Pauleit et al 2009 <sup>8</sup>     | 0.73 (0.66–0.79)            | 0.78 (0.68–0.86)            | >.05                                              |
| Lau et al 2010 <sup>9</sup>         | 0.72 (0.65–0.79)            | 0.77 (0.66–0.85)            | >.05                                              |
| Estrada et al 2008 <sup>10</sup>    | 0.72 (0.63–0.79)            | 0.77 (0.66–0.85)            | >.05                                              |
| McCarthy et al 2008 <sup>11</sup>   | 0.71 (0.63–0.78)            | 0.78 (0.66–0.86)            | >.05                                              |
| Kahn et al 1994 <sup>12</sup>       | 0.71 (0.62–0.78)            | 0.78 (0.68–0.86)            | >.05                                              |
| Thompson et al 1999 <sup>13</sup>   | 0.72 (0.64–0.79)            | 0.77 (0.66–0.85)            | >.05                                              |
| Sun et al 2004 <sup>14</sup>        | 0.71 (0.62–0.78)            | 0.77 (0.66–0.85)            | >.05                                              |
| Santra et al 2012 <sup>15</sup>     | 0.71 (0.63–0.79)            | 0.75 (0.65–0.83)            | >.05                                              |
| Hong et al 2011 <sup>16</sup>       | 0.71 (0.63–0.78)            | 0.77 (0.66–0.85)            | >.05                                              |
| Tan et al 2011 <sup>17</sup>        | 0.71 (0.62–0.78)            | 0.78 (0.67–0.86)            | >.05                                              |
| Enslow et al 2012 <sup>18</sup>     | 0.70 (0.62–0.77)            | 0.78 (0.68–0.86)            | >.05                                              |
| Belohlávek et al 2002 <sup>19</sup> | 0.72 (0.63–0.79)            | 0.77 (0.66–0.85)            | >.05                                              |
| Spence et al 2009 <sup>20</sup>     | 0.70 (0.62–0.77)            | 0.78 (0.68–0.86)            | >.05                                              |
| Janus et al 1993 <sup>21</sup>      | 0.71 (0.63–0.78)            | 0.78 (0.66–0.86)            | >.05                                              |
| Kim et al 2010 <sup>22</sup>        | 0.71 (0.63–0.78)            | 0.77 (0.67–0.85)            | >.05                                              |
| Cai et al 2009 <sup>23</sup>        | 0.72 (0.64–0.79)            | 0.78 (0.67–0.86)            | >.05                                              |
| Tripathi et al 2012 <sup>24</sup>   | 0.71 (0.63–0.78)            | 0.77 (0.66–0.85)            | >.05                                              |
| Li et al 2012 <sup>25</sup>         | 0.72 (0.64–0.79)            | 0.76 (0.65–0.84)            | >.05                                              |
| Ye et al 2009 <sup>26</sup>         | 0.70 (0.62–0.77)            | 0.78 (0.68–0.86)            | >.05                                              |

<sup>a</sup> For both sensitivity and specificity.
